# Supplementary material
Source: PubMed Central journal article supplement (PMC9887071)
Supplement: 41423_2022_963_MOESM1_ESM.pdf [file 41423_2022_963_MOESM1_ESM.pdf]

## Supplementary Information

### **TRIM27 maintains gut homeostasis by promoting intestinal stem cell self-renewal**

Wang *et al.*

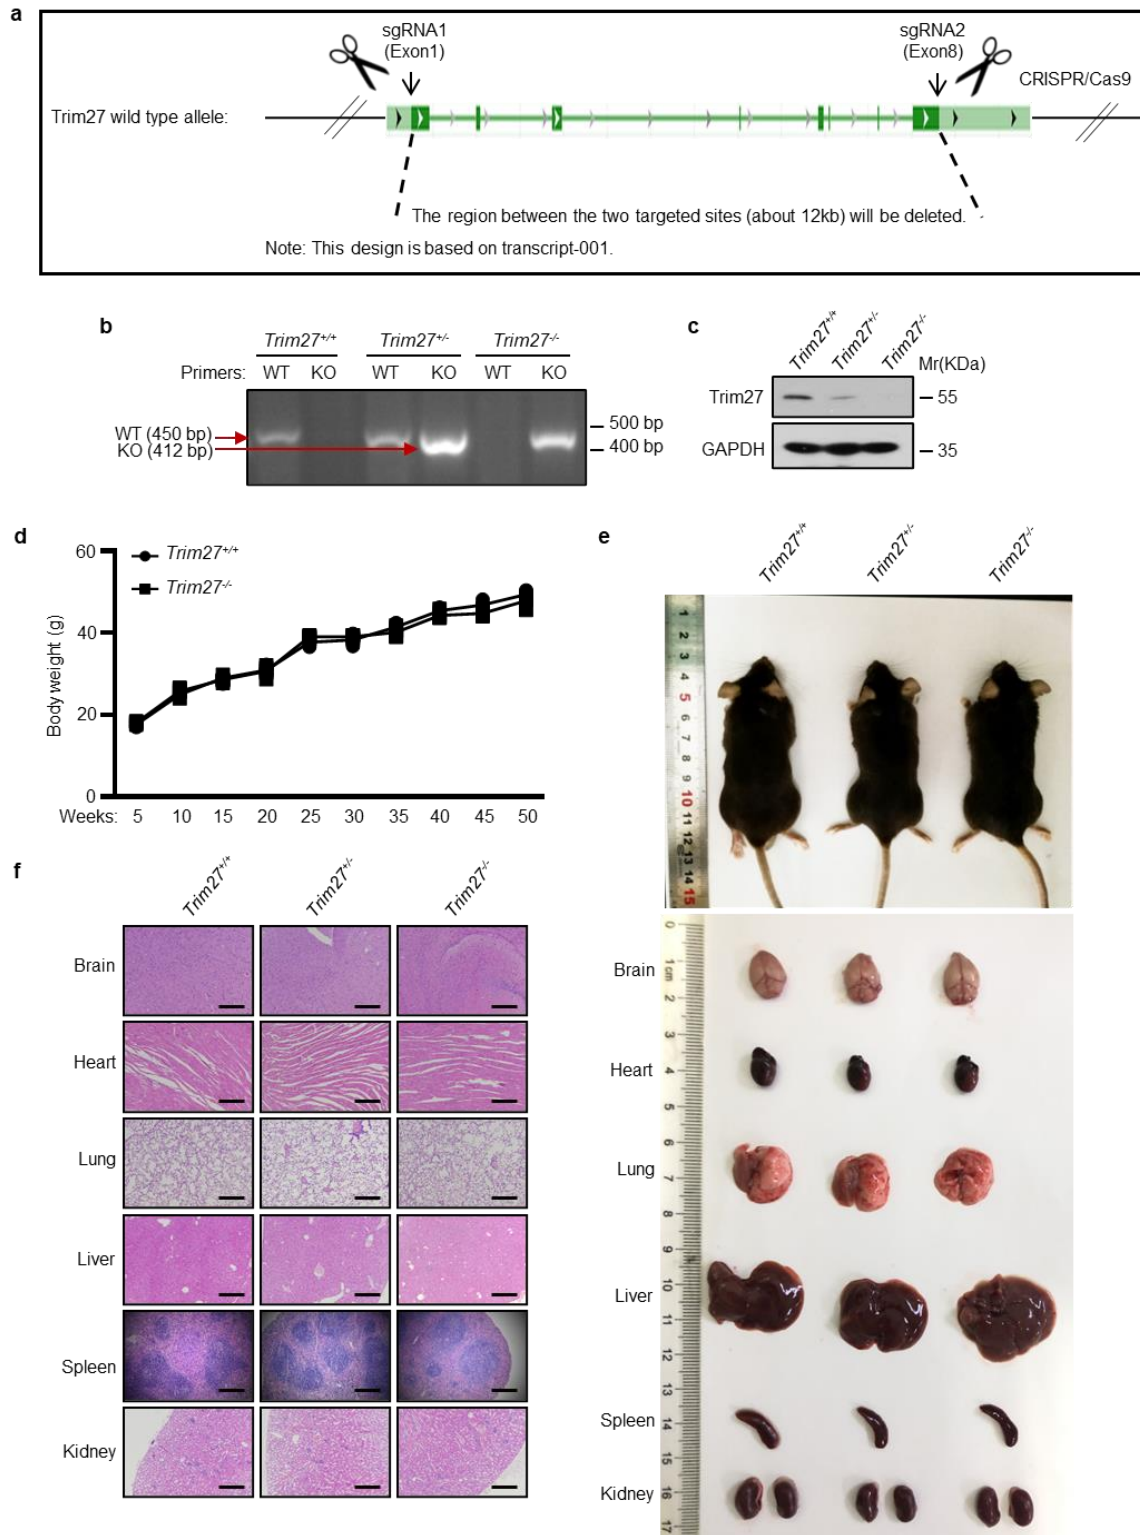

**Supplementary Fig. 1 The constructive strategy and analysis of *Trim27*-knockout mice. a**

Strategy for the generation of *Trim27*-knockout (*Trim27<sup>-/-</sup>*) mice. **b** PCR analysis of the mice.

The predicted sizes of PCR products were 450 bp (*Trim27<sup>+/+</sup>*) and 412 bp (*Trim27<sup>-/-</sup>*). WT, primers for identification of *Trim27<sup>+/+</sup>* mice; KO, primers for identification of *Trim27<sup>-/-</sup>* mice.

**c** Immunoblots of Trim27 in BMDMs from *Trim27<sup>+/+</sup>*, heterozygous (*Trim27<sup>+/-</sup>*) and *Trim27<sup>-/-</sup>* mice. **d** Time course of the body weight of *Trim27<sup>+/+</sup>* and *Trim27<sup>-/-</sup>* mice. **e** The morphology of 16-week-old *Trim27<sup>+/+</sup>*, *Trim27<sup>+/-</sup>* and *Trim27<sup>-/-</sup>* mice and their organs. **f** Hematoxylin and Eosin (H&E) staining of mouse organs from mice as in **e**. Scale bars, 200  $\mu\text{m}$ .

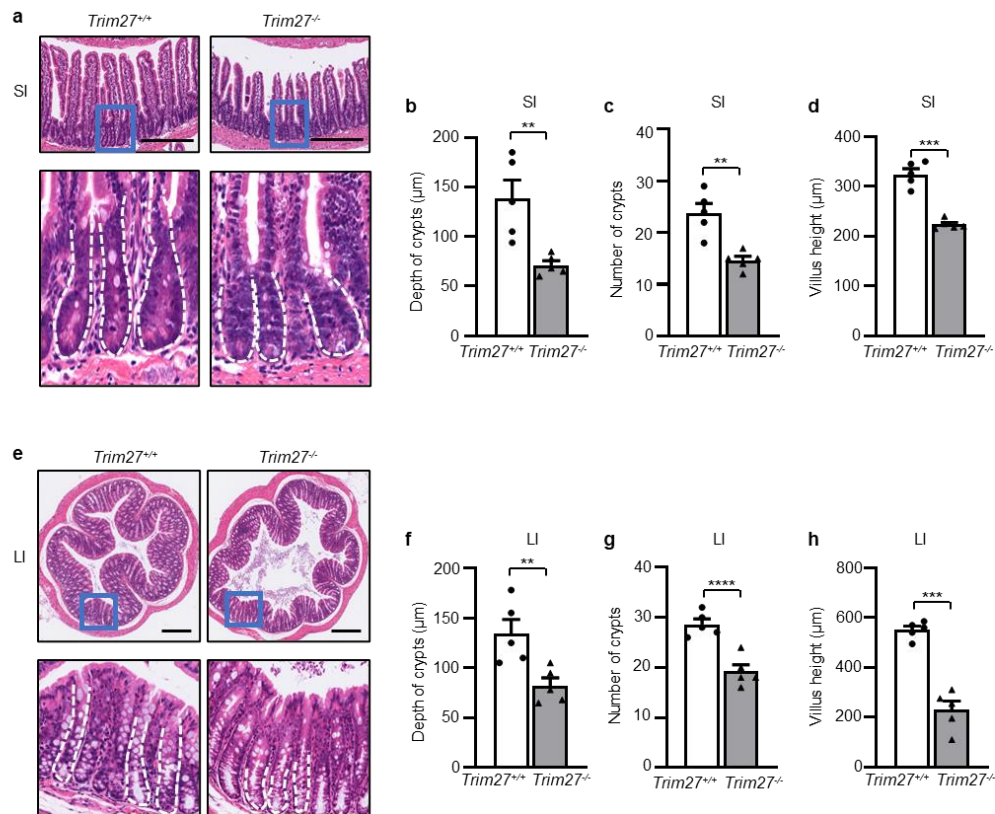

**Supplementary Fig. 2 TRIM27 promotes the development of intestines.** **a** H&E staining of the small intestine (SI) from 16-week-old *Trim27<sup>+/+</sup>* and *Trim27<sup>-/-</sup>* mice. Bottom, enlarged images of regions outlined in upper panels. Scale bars, 300  $\mu\text{m}$ . White dashed lines mark crypt borders. **b–d** Crypt depth (**b**), crypt numbers per mm (**c**) and villus height (**d**) of the SI from mice as in **a**. At least 20 randomly selected crypts (**b, d**) or randomly selected fields (**c**) from the SI of each mouse were analyzed, and the average was calculated. Five mice per group were analyzed. **e** H&E staining of the large intestine (LI) from 16-week-old *Trim27<sup>+/+</sup>* and *Trim27<sup>-/-</sup>* mice. Bottom, enlarged images of regions outlined in upper panels. Scale bars, 300  $\mu\text{m}$ . White dashed lines mark crypt borders. **f–h** Crypt depth (**f**), crypt numbers per mm (**g**) and villus height (**h**) of the LI from mice as in **e**. At least 20 randomly selected crypts (**f, h**) or randomly selected fields (**g**) from the LI of each mouse were analyzed, and the average was calculated. Five mice per group were analyzed. For **b–d** and **f–h**, statistical analyses were performed using unpaired two-tailed Student's *t*-test. Data are mean  $\pm$  SEM (n=5). \*\**P* < 0.01;

\*\*\* $P < 0.001$ ; \*\*\*\* $P < 0.0001$ .

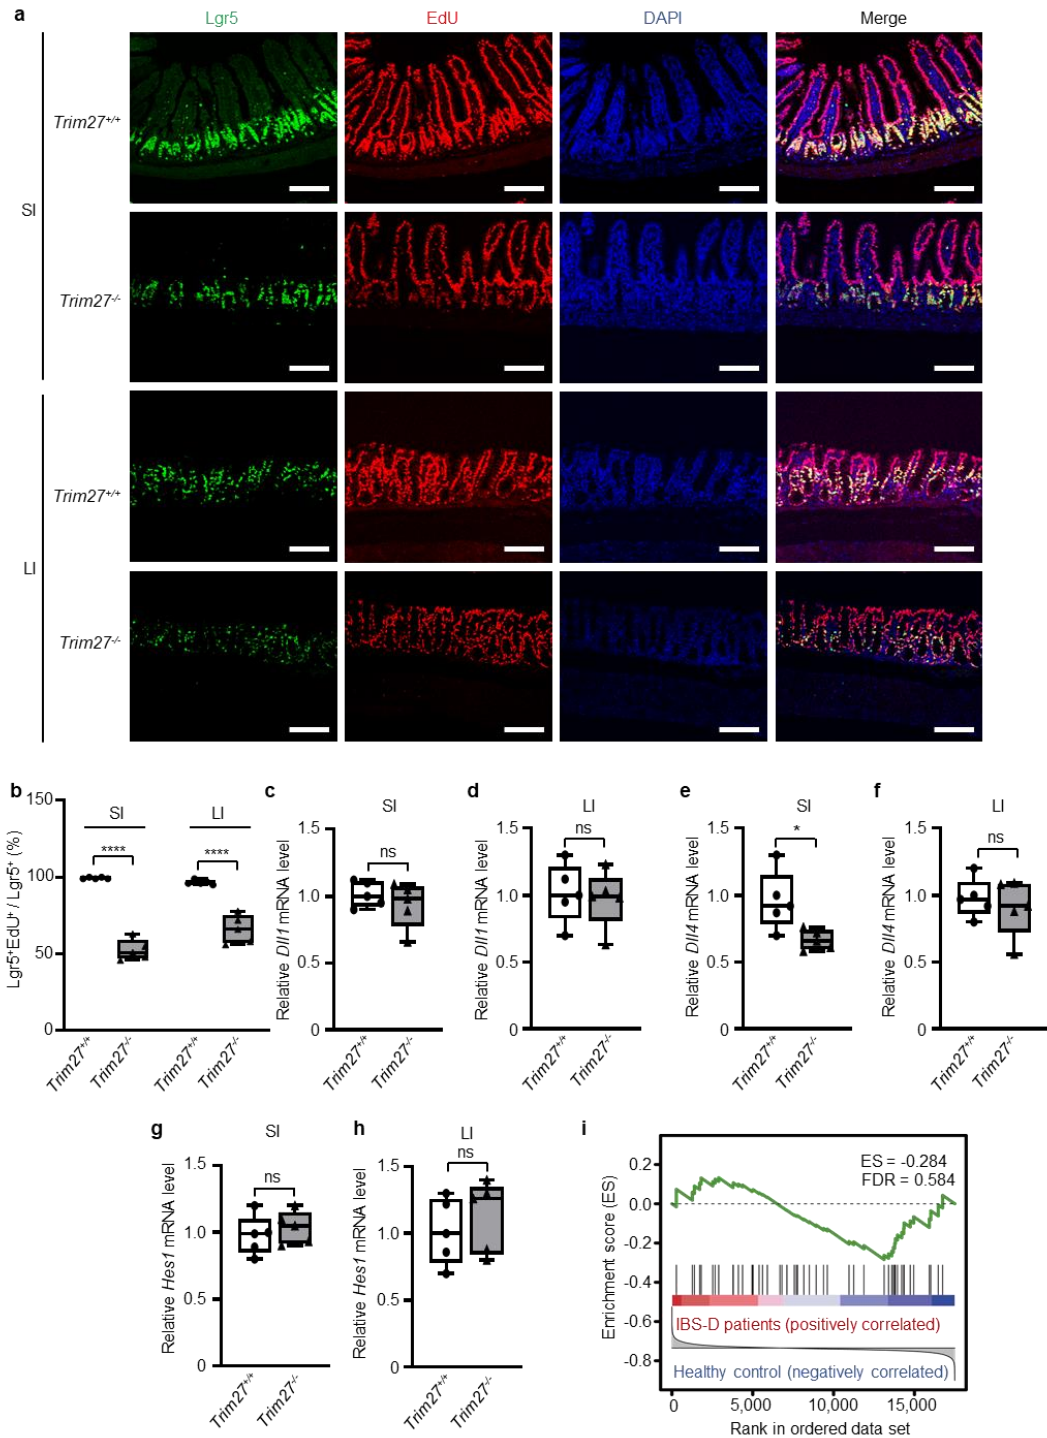

**Supplementary Fig. 3 TRIM27 promotes the proliferation of intestinal stem cells (ISCs) in a Notch signaling pathway-independent manner.** **a** Representative image of Lgr5 (green) and EdU signal (red) in the SI and LI from 16-week-old *Trim27<sup>+/+</sup>* and *Trim27<sup>-/-</sup>* mice on day 0.5 after a 4-day EdU administration. Scale bars, 100  $\mu$ m. **b** The proportion of Lgr5<sup>+</sup>EdU<sup>+</sup> cells in the SI and LI from mice as in **a**. At least 20 randomly

selected crypts from the SI and LI of each mouse were analyzed, and the average was calculated. Five mice per group were analyzed. **c, d** Quantitative PCR (qPCR) analysis of Notch target gene *Dll1* mRNA of crypts freshly isolated from the SI (**c**) and LI (**d**) from 16-week-old *Trim27<sup>+/+</sup>* and *Trim27<sup>-/-</sup>* mice. **e, f** qPCR analysis of Notch target gene *Dll4* mRNA of crypts freshly isolated from the SI (**e**) and LI (**f**) from mice as in **c**. **g, h** qPCR analysis of Notch target gene *Hes1* mRNA of crypts freshly isolated from the SI (**g**) and LI (**h**) from mice as in **c**. **i** Gene Set Enrichment Analysis (GSEA) results for Notch signaling pathway in IBS-D patients. FDR, false discovery rate. For **b, c-h**, statistical analyses were performed using unpaired two-tailed Student's t-test. Data are box-and-whisker plots displaying median, interquartile range (boxes) and minima and maxima (whiskers) (**b, c-h**, n=5).  $p > 0.05$ , not significant (ns);  $*p < 0.05$ ;  $****P < 0.0001$ .

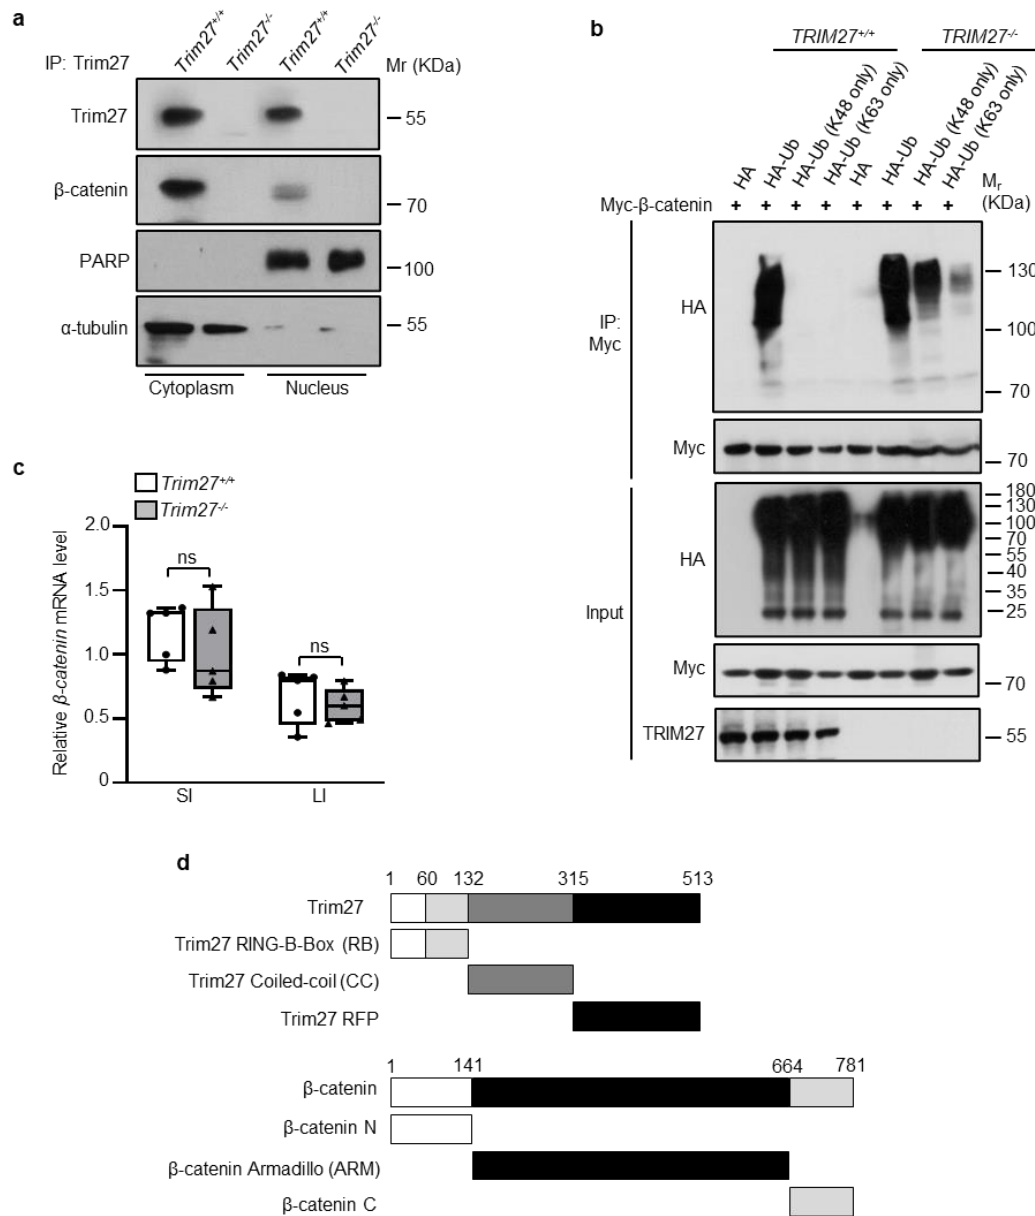

**Supplementary Fig. 4 TRIM27 interacts with  $\beta$ -catenin and mainly inhibits its K48-linked polyubiquitination.** **a** Immunoprecipitation (IP) of  $\beta$ -catenin by Trim27 in cytoplasm and nucleus of crypts from 16-week-old *Trim27*<sup>+/+</sup> and *Trim27*<sup>-/-</sup> mice. Crypts were lysed and immunoprecipitated with anti-Trim27 antibody. IP products were immunoblotted with the indicated antibodies. **b** *In vivo* ubiquitination assay of Myc- $\beta$ -catenin in *TRIM27*<sup>+/+</sup> and *TRIM27*<sup>-/-</sup> HEK293T cells transfected with the indicated plasmids for 24 h. Cells were lysed and immunoprecipitated with the antibody against Myc. The immunoprecipitated proteins were immunoblotted with the antibody against



HA. **c** qPCR analysis of *β-catenin* mRNA of crypts freshly isolated from the SI and LI from 16-week-old *Trim27<sup>+/+</sup>* and *Trim27<sup>-/-</sup>* mice. **d** Schematic diagram of Trim27 and β-catenin domains. For **c**, statistical analyses were performed using unpaired two-tailed Student's t-test. Data are box-and-whisker plots displaying median, interquartile range (boxes) and minima and maxima (whiskers) (**c**, n=5).  $p > 0.05$ , not significant (ns).

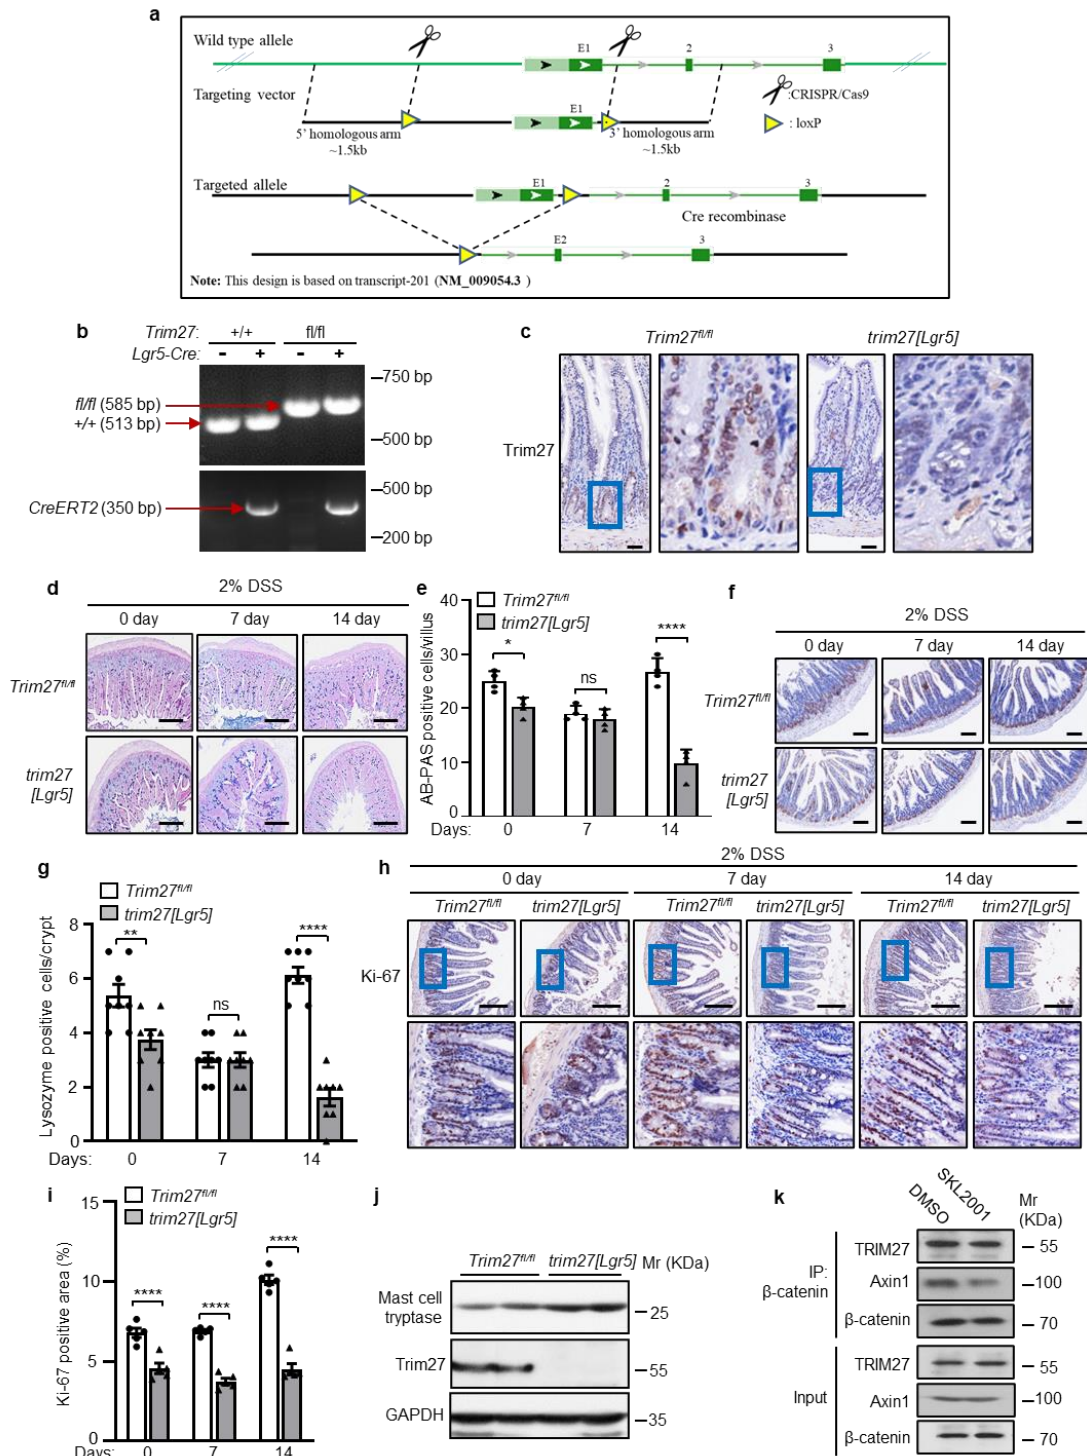

**Supplementary Fig. 5 Establishment and analysis of *Trim27<sup>fl/fl</sup>* and *trim27[Lgr5]* mice.** **a** Strategy for the generation of *trim27[Lgr5]* mice. **b** PCR analysis of the mice. The predicted sizes of PCR products were 585 bp (*Trim27<sup>fl/fl</sup>*), 513 bp (*Trim27<sup>+/+</sup>*) and 350 bp (*creERT2*). **c** Immunohistochemical analysis of Trim27 in the SI from 16-week-old *Trim27<sup>fl/fl</sup>* and *trim27[Lgr5]* mice. Scale bars, 50  $\mu$ m. **d** AB-PAS staining of the SI

from 16-week-old *Trim27<sup>fl/fl</sup>* and *trim27[Lgr5]* mice after 2% DSS treatment. Scale bars, 200  $\mu$ m. **e** The number of AB-PAS-positive goblet cells in intestinal tissue sections from mice as in **d**. At least 20 randomly selected villi from the SI of each mouse were analyzed, and the average was calculated. Five mice per group were analyzed. **f** Immunohistochemical analysis of lysozyme in the SI from 16-week-old *Trim27<sup>fl/fl</sup>* and *trim27[Lgr5]* mice after 2% DSS treatment. Scale bars, 200  $\mu$ m. **g** The number of lysozyme-positive Paneth cells per crypt in intestinal tissue sections from mice as in **f**. At least 20 randomly selected crypts from the SI of each mouse were analyzed, and the average was calculated. Five mice per group were analyzed. **h** Ki-67 staining of the SI from 16-week-old *Trim27<sup>fl/fl</sup>* and *trim27[Lgr5]* mice after 2% DSS treatment. Scale bars, 100  $\mu$ m. **i** Ki-67 positive area in intestinal tissue sections from mice as in **h**. Five mice per group were analyzed. **j** Immunoblots of mast cell tryptase, Trim27 and GAPDH in intestinal tissues from 16-week-old *Trim27<sup>fl/fl</sup>* and *trim27[Lgr5]* mice. **k** IP of TRIM27 and Axin1 by  $\beta$ -catenin in HEK293T cells. Cells were lysed and immunoprecipitated with anti- $\beta$ -catenin antibody in the presence or absence of SKL2001 (20  $\mu$ M). IP products were immunoblotted with the indicated antibodies. For **e**, **g** and **i**, statistical analyses were performed using two-way ANOVA and Sidak's multiple comparisons test. Data are mean  $\pm$  SEM (**e** and **i**, n=5; **g**, n=8).  $p > 0.05$ , not significant (ns); \* $p < 0.05$ ; \*\* $p < 0.01$ ; \*\*\*\* $p < 0.0001$ .

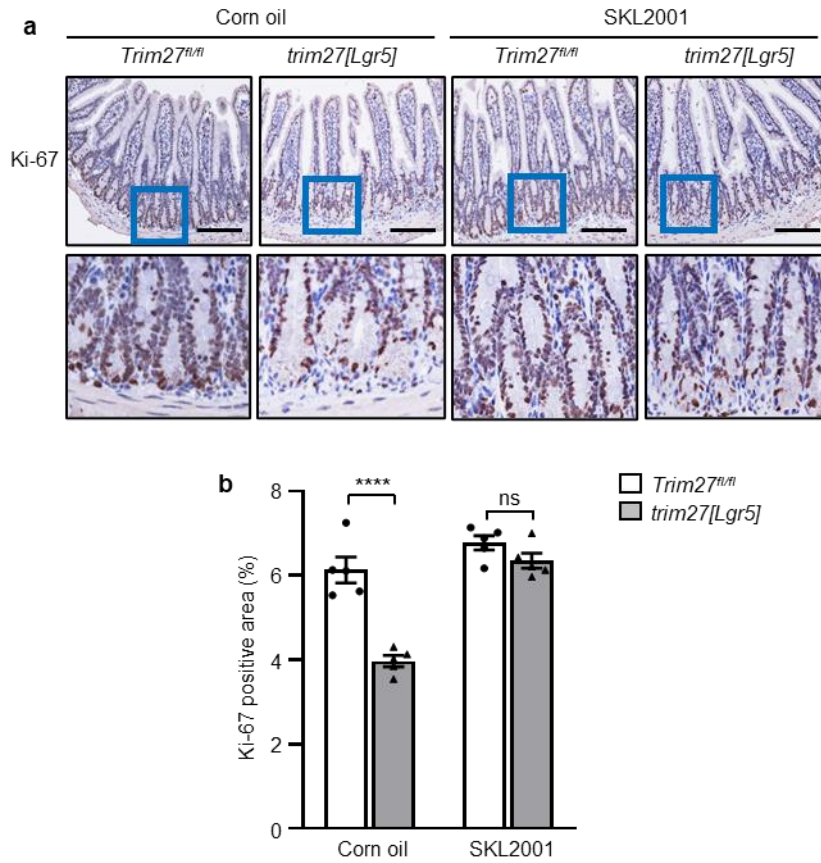

**Supplementary Fig. 6 The Wnt/ $\beta$ -catenin signaling activator SKL2001 promotes ISC self-renewal in *trim27[Lgr5]* mice. **a** Ki-67 staining of the SI from 12–16-week-old *Trim27<sup>fl/fl</sup>* and *trim27[Lgr5]* mice fed with corn oil or SKL2001. Scale bars, 300  $\mu$ m. **b** Ki-67 positive area in the SI from mice as in **a**. Five mice per group were analyzed. statistical analyses were performed using two-way ANOVA and Sidak's multiple comparisons test. Data are mean  $\pm$  SEM (b, n=5).  $p > 0.05$ , not significant (ns); \*\*\*\* $p < 0.0001$ .**

**Supplementary Table 1.** Oligonucleotides used for qPCR analysis or mouse genotyping PCR.

| <b>Name</b>                       | <b>Oligonucleotides (5'-3')</b> |
|-----------------------------------|---------------------------------|
| <i>Gapdh</i> -F                   | GGAGCGAGATCCCTCCAAAAT           |
| <i>Gapdh</i> -R                   | GGCTGTTGTCATACTTCTCATGG         |
| <i>Tnf</i> -F                     | CCTCTCTCTAATCAGCCCTCTG          |
| <i>Tnf</i> -R                     | GAGGACCTGGGAGTAGATGAG           |
| <i>Il1b</i> -F                    | GCAACTGTTCCCTGAACTCAACT         |
| <i>Il1b</i> -R                    | ATCTTTTGGGGTCCGTCAACT           |
| <i>Gper</i> -F                    | ATGGATGCGACTACTCCAGC            |
| <i>Gper</i> -R                    | AAGAGGGCAATCACGTAAGC            |
| <i>Axin2</i> -F                   | GTCCACCAAACCTATGCCCCG           |
| <i>Axin2</i> -R                   | GAGTGTAAGACTTGGTCCA             |
| <i>Myc</i> -F                     | CAACGTCTTGGAACGTCAGA            |
| <i>Myc</i> -R                     | TCGTCTGCTTGAATGGACAG            |
| <i>Ctnnb1</i> -F                  | GATTCTGGAATCCATTCTGG            |
| <i>Ctnnb1</i> -R                  | GGAAAAGCCTTGCTCCCATT            |
| <i>Wnt3a</i> -F                   | CCTCGGAGATGGTGGTAGA             |
| <i>Wnt3a</i> -R                   | GTTAGGTTCGCAGAAGTTGG            |
| <i>Dll1</i> -F                    | CGGGGGCTCTGGCCCGCCTT            |
| <i>Dll1</i> -R                    | AGCACTGGCGTGACAGCACT            |
| <i>Dll4</i> -F                    | ACGCCGGTATTGGGCACCAA            |
| <i>Dll4</i> -R                    | TTGGATGTTGAGTGAGAAGG            |
| <i>Hes1</i> -F                    | AATGCCGGGAGCTATCTTTCT           |
| <i>Hes1</i> -R                    | CCAGCCAGTGTCAACACGA             |
| <i>β-catenin</i> -F               | CCCAGTCCTTCACGCAAGAG            |
| <i>β-catenin</i> -R               | CATCTAGCGTCTCAGGGAACA           |
| <i>Trim27</i> <sup>+/+</sup> -F   | CTCCGGAGCCGAGAAGCGGAGCGAG       |
| <i>Trim27</i> <sup>+/+</sup> -R   | TCCTGCTCGCAGTACAGCTTCAGAG       |
| <i>Trim27</i> <sup>-/-</sup> -F   | GAGCAGCTGTGCGGGGACGGGTCTG       |
| <i>Trim27</i> <sup>-/-</sup> -R   | TGGAAAGTGGGTCTCCAAATCCAAATC     |
| <i>Trim27</i> <sup>fl/fl</sup> -F | GCACGTGCTCTCTACTAAGCTGT         |
| <i>Trim27</i> <sup>fl/fl</sup> -R | GTGGCGCACTCCATTAATCCTCTTGT      |
| <i>CreERT2</i> -F                 | CGATGCAACGAGTGATGAGG            |
| <i>CreERT2</i> -R                 | CGCATAACCAGTGAAACAGC            |
